# Supplementary material
Source: ML conference proceedings conference paper supplement (https://proceedings.mlr.press/v119/tang20b.html)
Supplement: Supplementary file 1 [file tang20b-supp.pdf]

## A. Proof of Lemma 2.5

To simplify the notation, we omit the ‘BO’ in the superscript. We begin with a few algebraic identities for  $p_k$ . It is easy to see from (2.18)-(2.19) that

$$p_k = \frac{k + a_0 - 2}{k + 2a_0} p_{k-1} \quad \text{for } k \geq 2. \quad (\text{A.1})$$

Therefore,  $\sum_{j=2}^k (j + 2a_0) p_j = \sum_{j=2}^k (j + a_0 - 2) p_{j-1}$  which implies that

$$p_{>k-1} = \frac{k + 2a_0}{a_0 + 1} p_k \quad \text{for } k \geq 2. \quad (\text{A.2})$$

Further by summing both sides of (A.2), we get  $\sum_{k \geq 1} k p_k = 2$ . Observe that

$$\begin{aligned} \ell'_\infty(a) &= \sum_{k \geq 0} \frac{p_{>k+1}}{a+k} - \frac{1}{a+1} \\ &= \sum_{k \geq 0} \frac{(k+2+2a_0)p_{k+2}}{(a_0+1)(a+k)} \\ &\quad - \frac{1}{a+1} \sum_{k \geq 0} \frac{k+2+2a_0}{k+a_0} p_{k+2} \\ &= \frac{a-a_0}{(a_0+1)(a+1)} \sum_{k \geq 0} \frac{(k+2+2a_0)(k-1)}{(k+a_0)(k+a)} p_{k+2} \\ &= \frac{a-a_0}{(a_0+1)(a+1)} \sum_{k \geq 0} \frac{k-1}{k+a} p_{k+1}. \end{aligned}$$

where the second equality is due to (A.2) and the last one stems from (A.1). In addition,

$$\sum_{k \geq 0} \frac{k-1}{k+a} p_{k+1} \leq \frac{1}{1+a} \sum_{k \geq 0} (k-1) p_{k+1} = 0,$$

where the last equality is due to the fact that  $\sum_{k \geq 1} k p_k = 2$ . Therefore,  $\ell'_\infty(\cdot)$  has a unique zero at  $a_0$ , and  $\ell'_\infty(a) < 0$  if  $a > a_0$  and  $\ell'_\infty(a) > 0$  if  $a < a_0$ . These imply that  $\ell_\infty(\cdot)$  has a unique maximum at  $a_0$ .

Now we prove (2.21). We have

$$\begin{aligned} \ell'_n(a) - \ell'_\infty(a) &= \sum_{k \geq 0} \frac{Z_{>k+1}^n/n - p_{>k+1}}{a+k} \\ &\quad + \left( \frac{1}{n} \sum_{k=1}^n \frac{1}{a+1-k^{-1}} - \frac{1}{a+1} \right). \quad (\text{A.3}) \end{aligned}$$

Standard analysis shows that the second term on the r.h.s. of (A.3) goes to 0 as  $n \rightarrow \infty$ . Note that  $(k+2)Z_{>k+1}^n = \sum_{j \geq k+2} (k+2)Z_j^n \leq \sum_{j \geq k+2} j Z_j^n \leq 2n$ , which implies

$Z_{>k+1}^n/n \leq \frac{2}{k+2}$ . Consequently,

$$\begin{aligned} \sup_{a > \varepsilon} \left| \sum_{k \geq 0} \frac{Z_{>k+1}^n/n - p_{>k+1}}{a+k} \right| &\leq \sum_{k=0}^K \frac{|Z_{>k+1}^n/n - p_{>k+1}|}{\varepsilon+k} \\ &\quad + \sum_{k > K} \frac{2}{(2+k)(a+k)} + \sum_{k > K} \frac{p_{>k+1}}{a+k}. \quad (\text{A.4}) \end{aligned}$$

The first term on the r.h.s. of (A.4) converges to 0 a.s. by Theorem 2.4, and the last two terms can be made arbitrarily small for  $K$  sufficiently large. Combining the above estimates yields the desired result.

## B. Proof of Lemma 2.6

It follows easily from the definition that  $(\sum_{k=1}^n f_k(a_0); n \geq 1)$  is a martingale. To prove the convergence (2.24), it suffices to use Theorem 3.2 in (Hall & Heyde, 1980) with the following conditions:

- $n^{-1/2} \max_k |f_k(a_0)| \rightarrow 0$  in probability.
- $\mathbb{E}(n^{-1} \max_k f_k^2(a_0))$  is bounded in  $n$ .
- $n^{-1} \sum_{k=1}^n f_k^2(a_0) \rightarrow \sigma^2$  in probability.

The first two conditions are straightforward since  $|f_k(a)| \leq 2/a$ . Now we check the last condition. Write

$$\begin{aligned} \frac{1}{n} \sum_{k=1}^n f_k^2(a_0) &= \frac{1}{n} \sum_{k=1}^n \frac{1}{(a_0 + d_k(v^{(k)}) - 1)^2} + \frac{1}{n} \sum_{k=1}^n \frac{1}{(a_0 + 1 - k^{-1})^2} \\ &\quad - \frac{2}{n} \sum_{k=1}^n \frac{1}{(a_0 + d_k(v^{(k)}) - 1)(a_0 + 1 - k^{-1})} \\ &:= S_1 + S_2 - 2S_3. \end{aligned}$$

Note that

$$S_1 = \sum_{k \geq 0} \frac{Z_{>k+1}^n/n}{(a_0+k)^2} \rightarrow \sum_{k \geq 0} \frac{p_{>k+1}}{(a_0+k)^2} \quad a.s.$$

which follows from Theorem 2.4. By standard analysis,  $S_2 \rightarrow \frac{1}{(a_0+1)^2}$ . We decompose  $S_3$  into two terms:

$$\begin{aligned} S_3 &= \frac{1}{n} \sum_{k=1}^n \frac{1}{a_0 + d_k(v^{(k)}) - 1} \left( \frac{1}{a_0 + 1 - k^{-1}} - \frac{1}{a_0 + 1} \right) \\ &\quad + \frac{1}{(a_0+1)n} \sum_{k=1}^n \frac{1}{a_0 + d_k(v^{(k)}) - 1}, \end{aligned}$$

where the first term on the r.h.s. is bounded by  $\frac{1}{an} \sum_{k=1}^n \left( \frac{1}{a_0+1-k^{-1}} - \frac{1}{a_0+1} \right) \rightarrow 0$ , and the second term converges almost surely to  $\frac{1}{a_0+1} \sum_{k \geq 0} \frac{p_{>k+1}}{a_0+k}$ . Combining all the above estimates yields the desired result.

### C. Proof of Lemma 2.7

Write

$$\begin{aligned} \frac{1}{n} \sum_{k=1}^n f'_k(a^*) &= \frac{1}{n} \sum_{k=1}^n f'_k(a_0) + \frac{1}{n} \sum_{k=1}^n (f'_k(a^*) - f'_k(a_0)) \\ &:= T_1 + T_2. \end{aligned}$$

Observe that  $f'_k(a) = -f_k^2(a) - 2f_k(a)\frac{1}{a+1-k^{-1}}$ . We get

$$T_1 = -\frac{1}{n} \sum_{k=1}^n f_k^2(a_0) - \frac{2}{n} \sum_{k=1}^n f_k(a_0) \frac{1}{a_0 + 1 - k^{-1}}. \quad (\text{C.1})$$

The first term on the r.h.s. of (C.1) converges to  $-\sigma^2$  as proved in Proposition 2.6. Recall the definition of  $S_2, S_3$ . It is easy to see that

$$\begin{aligned} \frac{1}{n} \sum_{k=1}^n f_k(a_0) \frac{1}{a_0 + 1 - k^{-1}} &= S_3 - S_2 \\ &\rightarrow \frac{1}{a+1} \sum_{k \geq 0} \frac{p_{>k+1}}{a_0 + k} - \frac{1}{(a_0 + 1)^2}. \end{aligned}$$

Therefore,  $T_1 \rightarrow -\beta$  in probability. By standard analysis,  $|T_2| \leq C|a^* - a_0|$  for some  $C > 0$ . Note that  $a^* \in (a_0, \hat{a}_n^{BO})$ . By Theorem 2.1,  $|a^* - a_0| \rightarrow 0$  which implies  $T_2 \rightarrow 0$ . The above estimates lead to the desired result.

### D. Proof of Lemma 2.9

As discussed in Section 2.3, the consistency of  $\hat{\pi}$  follows from standard exponential family theory. It suffices to prove that  $\hat{\gamma} \rightarrow \gamma^0$  almost surely.

Let us go back to the limit log-likelihood (2.30). Observe that  $\ell_\infty^{BPA}$  is homogeneous of order 1, i.e.  $\ell_\infty^{BPA}(a\gamma) = \ell_\infty^{BPA}(\gamma)$  for each  $a > 0$ . By taking the partial derivatives of (2.30) and equating to 0, we get

$$\begin{aligned} &\frac{\partial}{\partial \gamma_{ij}} \ell_\infty^{BPA}(\gamma) \\ &= \begin{cases} \frac{\theta_{ij}^0}{\gamma_{ij}} - \frac{\pi_i^0 p_j^0}{\sum_{k=1}^K \gamma_{ik} p_k^0} - \frac{\pi_j^0 p_i^0}{\sum_{k=1}^K \gamma_{jk} p_k^0} & \text{for } i \neq j, \\ \frac{\theta_{ii}^0}{\gamma_{ii}} - \frac{\pi_i^0 p_i^0}{\sum_{k=1}^K \gamma_{ik} p_k^0} & \text{for } i = j. \end{cases} \end{aligned} \quad (\text{D.1})$$

By (2.27), we have  $\nabla \ell_\infty^{BPA}(\gamma_0) = \mathbf{0}$ , i.e.  $\gamma_0$  is a stationary point of  $\ell_\infty^{BPA}$ . Now it suffices to prove Lemma 2.9 to conclude.

Note that  $\ell_\infty^{BPA}(\gamma) \rightarrow -\infty$  as  $\gamma \in \partial \mathcal{D}$ . It suffices to prove that  $\nabla \ell_\infty^{BPA}(\gamma) = \mathbf{0}$  has a unique solution. First  $\partial \ell_\infty^{BPA} / \partial \gamma_{ii} = 0$  gives

$$\sum_{k=1}^K \gamma_{ik} p_k^0 = \frac{\pi_i^0 p_i^0}{\theta_{ii}^0} \gamma_{ii}. \quad (\text{D.2})$$

By injecting (D.2) into the equation  $\partial \ell_\infty^{BPA} / \partial \gamma_{ij} = 0$ , we get

$$\frac{\theta_{ij}^0}{\gamma_{ij}} = \frac{\theta_{ii}^0 p_j^0}{p_i^0} \frac{1}{\gamma_{ii}} + \frac{\theta_{jj}^0 p_i^0}{p_j^0} \frac{1}{\gamma_{jj}}. \quad (\text{D.3})$$

Consequently, the values of  $(\gamma_{ij}; i \neq j)$  is uniquely determined by those of  $(\gamma_{ii}; 1 \leq i \leq K)$ . By injecting (D.3) into (D.2), we get a system of equations on  $(\gamma_{ii}; 1 \leq i \leq K)$ :

$$\sum_{k=1}^K \theta_{ik}^0 \left( \frac{\theta_{ii}^0 p_j^0}{p_i^0} \frac{1}{\gamma_{ii}} + \frac{\theta_{kk}^0 p_i^0}{p_k^0} \frac{1}{\gamma_{kk}} \right)^{-1} p_k^0 = \frac{\pi_i^0 p_i^0}{\theta_{ii}^0} \gamma_{ii} \quad (\text{D.4})$$

For  $K = 2$ , it is easy to solve the equations together with the constraints  $\gamma_{11} = 1$ . For  $K \geq 3$ , the explicit solution is not available but we prove that the equations have a unique solution. To illustrate, we consider the generic case  $K = 3$ . All other cases can be proceeded in a similar way.

Let  $x_1 := \frac{\theta_{11}^0 p_2^0}{p_1^0} \gamma_{22} \left( \frac{\theta_{11}^0 p_2^0}{p_1^0} \gamma_{22} + \frac{\theta_{22}^0 p_1^0}{p_2^0} \gamma_{11} \right)^{-1}$ ,  $x_2 := \frac{\theta_{11}^0 p_3^0}{p_1^0} \gamma_{33} \left( \frac{\theta_{11}^0 p_3^0}{p_1^0} \gamma_{33} + \frac{\theta_{33}^0 p_1^0}{p_3^0} \gamma_{11} \right)^{-1}$ , and  $x_3 := \frac{\theta_{33}^0 p_2^0}{p_3^0} \gamma_{22} \left( \frac{\theta_{33}^0 p_2^0}{p_3^0} \gamma_{22} + \frac{\theta_{22}^0 p_3^0}{p_2^0} \gamma_{33} \right)^{-1}$ . The equations (D.4) give

$$\begin{cases} \theta_{12}^0 x_1 + \theta_{13}^0 x_2 = \pi_1^0 - \theta_{11}^0, \\ \theta_{21}^0 (1 - x_1) + \theta_{23}^0 (1 - x_3) = \pi_2^0 - \theta_{22}^0, \\ \theta_{31}^0 (1 - x_2) + \theta_{32}^0 x_3 = \pi_3^0 - \theta_{33}^0. \end{cases} \quad (\text{D.5})$$

It suffices to prove that the equations (D.5) have a unique solution. Observe that the system (D.5) has a solution  $(x_1^0, x_2^0, x_3^0)$  by taking  $\gamma_{ii} = \gamma_{ii}^0$ . Algebraic manipulation shows that the set of solutions to (D.5) has dimension 1, with form

$$(x_1, x_2, x_3) = (x_1^0, x_2^0, x_3^0) + \lambda(1, -\theta_{12}^0/\theta_{13}^0, -\theta_{21}^0/\theta_{23}^0).$$

Consequently,

$$\begin{aligned} \frac{\gamma_{11}}{\gamma_{22}} &= \frac{\theta_{11}^0 (p_2^0)^2}{\theta_{22}^0 (p_1^0)^2} \frac{1 - x_0 - \lambda}{x_0 + \lambda}, & \frac{\gamma_{11}}{\gamma_{13}} &= \frac{\theta_{11}^0 (p_3^0)^2}{\theta_{33}^0 (p_1^0)^2} \frac{1 - y_0 + \lambda \theta_{12}^0 \theta_{13}^0}{y_0 - \lambda \theta_{12}^0 \theta_{13}^0} \\ \frac{\gamma_{33}}{\gamma_{22}} &= \frac{\theta_{33}^0 (p_2^0)^2}{\theta_{22}^0 (p_3^0)^2} \frac{1 - z_0 + \lambda \theta_{21}^0 / \theta_{23}^0}{z_0 - \lambda \theta_{21}^0 / \theta_{23}^0}, \end{aligned}$$

which implies that

$$\frac{1 - x_0 - \lambda}{x_0 + \lambda} = \frac{(1 - y_0 + \lambda \theta_{12}^0 \theta_{13}^0)(1 - z_0 + \lambda \theta_{21}^0 / \theta_{23}^0)}{(y_0 - \lambda \theta_{12}^0 \theta_{13}^0)(z_0 - \lambda \theta_{21}^0 / \theta_{23}^0)}. \quad (\text{D.6})$$

Note that the l.h.s. of (D.6) is decreasing in  $\lambda$  while the r.h.s. is increasing in  $\lambda$ . Thus,  $\lambda = 0$  is the only solution which proves the uniqueness.
